# Supplementary material for: Capturing the Catalytic Proton of Dihydrofolate Reductase: Implications for General Acid–Base Catalysis
Source: PubMed Central journal article supplement — ACS Catal. 2021 Apr 28;11(9):5873–84. doi: 10.1021/acscatal.1c00417 (PMC8154319; doi:10.1021/acscatal.1c00417), 2021-04-28
Supplement: cs1c00417_si_001.pdf [file cs1c00417_si_001.pdf]

## Supporting Information:

### **Capturing the catalytic proton of dihydrofolate reductase: implications for general acid-base catalysis**

**Authors: Qun Wan<sup>†,\*,</sup>, Brad C. Bennett<sup>‡</sup>, Troy Wymore<sup>§</sup>, Zhihong Li<sup>†,\*,</sup>, Mark A. Wilson<sup>||</sup>, Charles Brooks III<sup>§</sup>, Paul Langan<sup>¶</sup>, Andrey Kovalevsky<sup>¶</sup>, and Chris G. Dealwis<sup>#,§,\*</sup>**

#### **Affiliations:**

<sup>†</sup>College of Sciences, Nanjing Agricultural University, Nanjing 210095, People's Republic of China; "The Key Laboratory of Plant Immunity, Nanjing Agricultural University, Nanjing 210095, People's Republic of China; <sup>‡</sup>Biological and Environmental Science Department, Samford University, Birmingham, AL 35229; <sup>§</sup>Department of Chemistry, University of Michigan, Ann Arbor, MI 48109; <sup>||</sup>Department of Biochemistry and Redox Biology Center, University of Nebraska, Lincoln, NE 68588; <sup>¶</sup>Neutron Scattering Division, Oak Ridge National Laboratory, Oak Ridge, TN 37830; <sup>#</sup>Department of Pharmacology, Case Western Reserve University, Cleveland, OH 44106; <sup>§</sup>Department of Chemistry, Case Western Reserve University, Cleveland, OH 44106.

\*To whom correspondence should be addressed: [qunwan@njau.edu.cn](mailto:qunwan@njau.edu.cn) (Q.W.); [cxdl14@case.edu](mailto:cxdl14@case.edu) (C.D.)

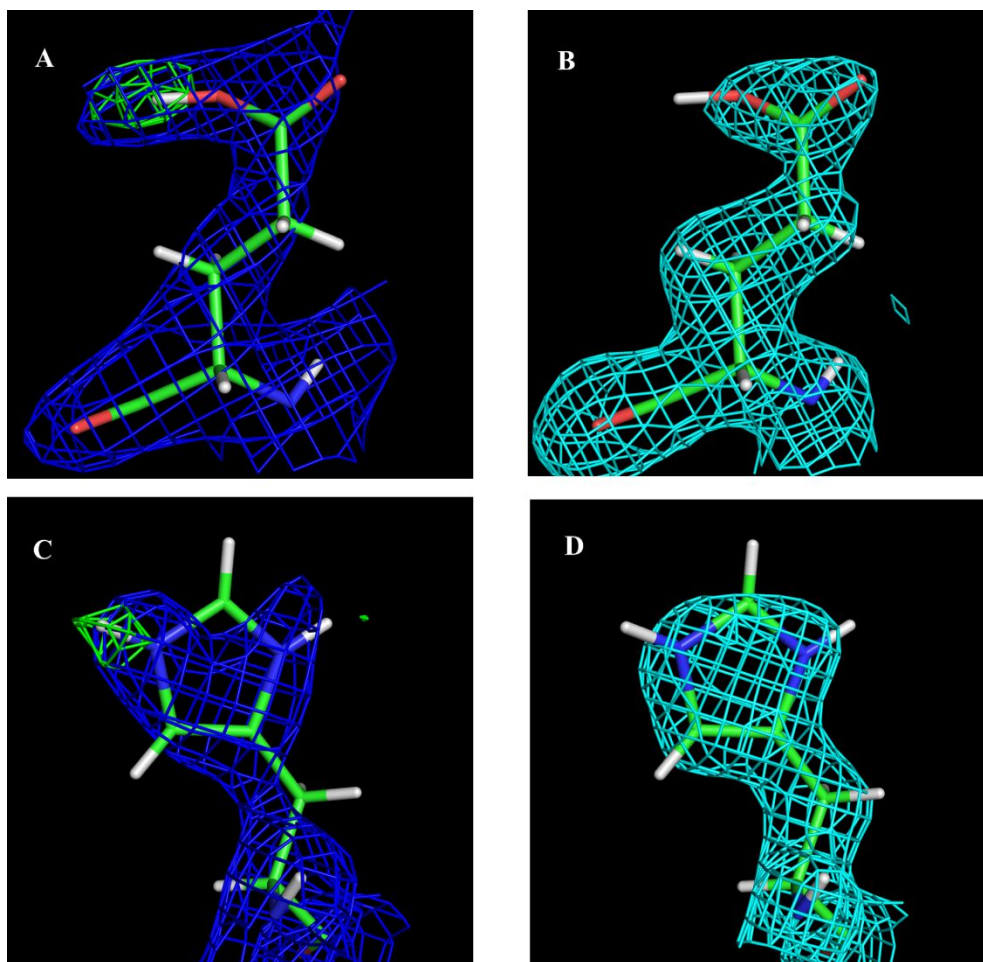

**Fig. S1. Glu101 and His45 are protonated at pH4.5.** (A) 2Fo-Fc nuclear density map (contour level:  $1.0 \sigma$ ) and Fo-Fc nuclear density omit map (contour level:  $3.0 \sigma$ ) around Glu101. The omit map was created without the deuterium contribution for neutron scattering. (B) 2Fo-Fc electron density map (contour level:  $1.0 \sigma$ ) around Glu101. (C) 2Fo-Fc nuclear density map (contour level:  $1.0 \sigma$ ) and Fo-Fc nuclear density omit map (contour level:  $3.0 \sigma$ ) around His45. (D) 2Fo-Fc electron density map (contour level:  $1.0 \sigma$ ) around His45.

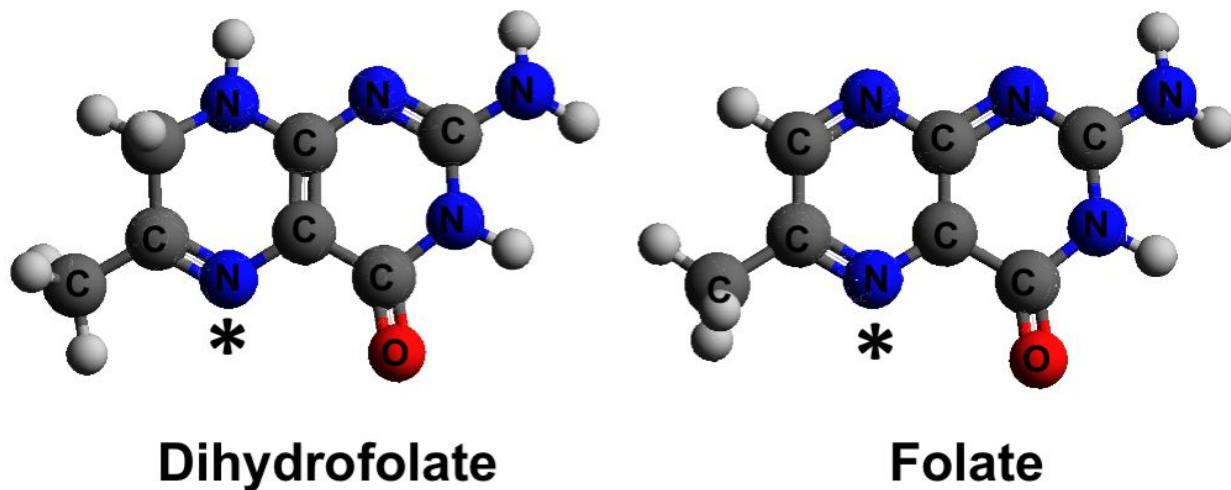

**Fig. S2.** Structures of geometry-optimized dihydrofolate and folate moieties used to calculate the proton affinity at N5. The star symbol shows the location of N5 that is protonated in order to calculate the proton affinity. The estimated proton affinity at N5 for dihydrofolate is 24.0 kcal/mol greater than that of folate. See Table S2 for calculations.

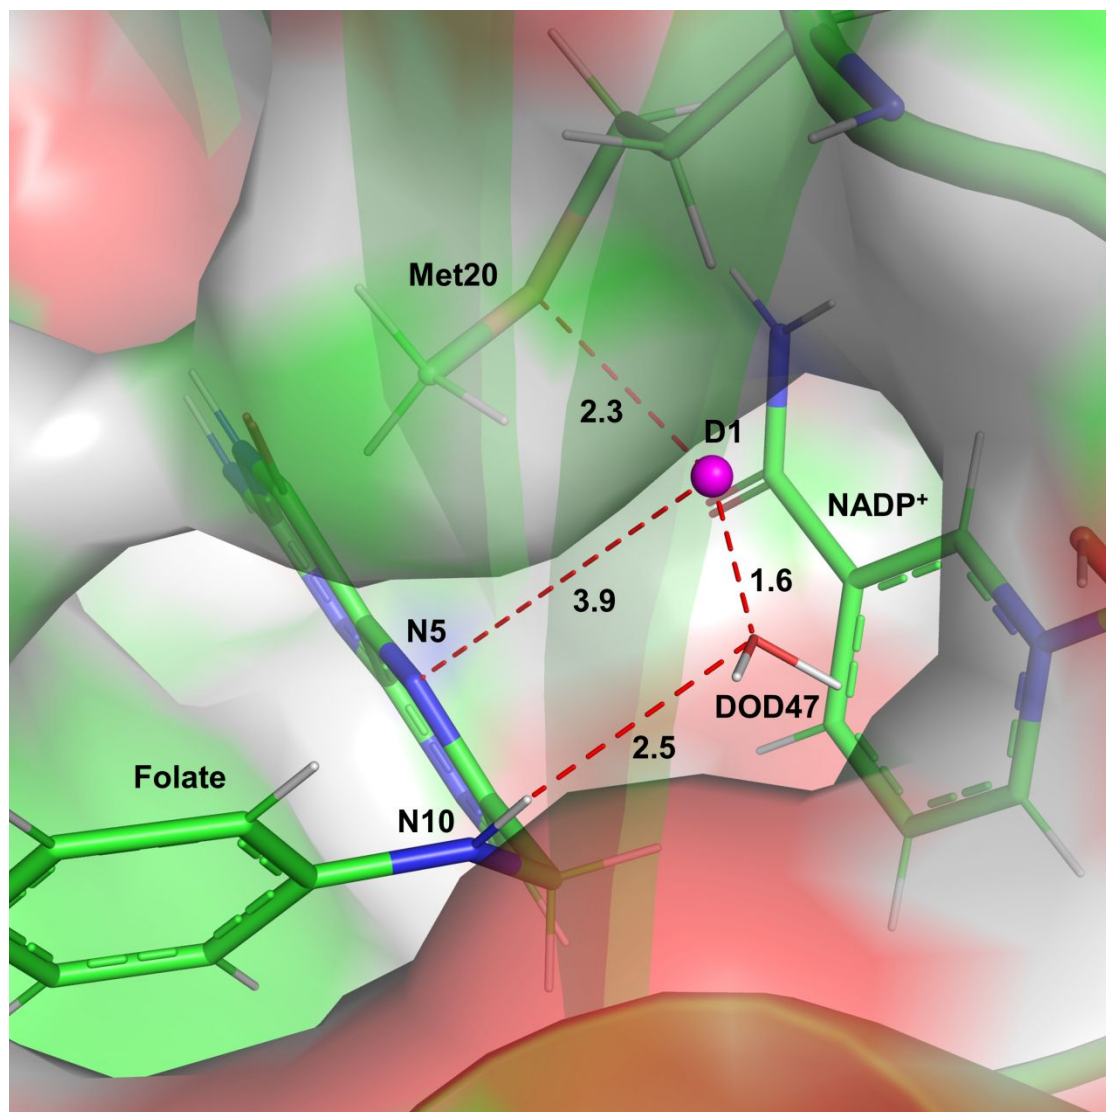

**Fig. S3. Surface representation of the DHFR active site around the deuterium.** The discrete deuterium (D1) is close to the surface of the Met20 side chain. This short, shallow “tunnel” cannot sterically accommodate a water molecule.

| <b>Table S1. Data collection and refinement</b>                |                                               |                                               |                                               |
|----------------------------------------------------------------|-----------------------------------------------|-----------------------------------------------|-----------------------------------------------|
| Data collection                                                | Neutron                                       | X-ray                                         | X-ray                                         |
| Temperature (K)                                                | 291                                           | 291                                           | 291                                           |
| pH                                                             | 4.5                                           | 4.5                                           | 7.0                                           |
| Space group                                                    | P2 <sub>1</sub> 2 <sub>1</sub> 2 <sub>1</sub> | P2 <sub>1</sub> 2 <sub>1</sub> 2 <sub>1</sub> | P2 <sub>1</sub> 2 <sub>1</sub> 2 <sub>1</sub> |
| Cell dimensions                                                |                                               |                                               |                                               |
| a, b, c (Å)                                                    | 34.3, 45.6, 99.2                              | 34.1, 45.6, 99.1                              | 34.3, 45.6, 99.0                              |
| $\alpha, \beta, \gamma$ (°)                                    |                                               | $\alpha=\beta=\gamma=90$                      |                                               |
| Resolution (Å)                                                 | 2.1                                           | 1.65                                          | 1.60                                          |
| Unique reflections                                             | 7031                                          | 18163                                         | 20751                                         |
| Redundancy                                                     | 2.3(2.0) <sup>a</sup>                         | 3.9(3.3) <sup>a</sup>                         | 4.1 (4.0)                                     |
| Completeness (%)                                               | 72.4(61.7) <sup>a</sup>                       | 93.9(77.8) <sup>a</sup>                       | 97.6 (94.0)                                   |
| R <sub>sym</sub> <sup>b</sup>                                  | 0.093(0.303) <sup>a</sup>                     | 0.040(0.422) <sup>a</sup>                     | 0.097 (0.446)                                 |
| I/ $\sigma$ (I)                                                | 6.6(2.3) <sup>a</sup>                         | 24.9(2.5) <sup>a</sup>                        | 13.7 (2.97)                                   |
| refinement                                                     |                                               |                                               |                                               |
| R <sub>work</sub> <sup>c</sup> /R <sub>free</sub> <sup>d</sup> | 0.1766/ 0.2187                                | 0.1522/ 0.1816                                | 0.1767/0.1956                                 |
| No. atoms                                                      |                                               |                                               |                                               |
| Protein                                                        | 2768                                          | 1268                                          | 1268                                          |
| NADP <sup>+</sup>                                              | 80                                            | 48                                            | 48                                            |
| folate                                                         | 54                                            | 32                                            | 32                                            |
| Mn <sup>2+</sup>                                               | -                                             | -                                             | 1                                             |
| water                                                          | 345                                           | 119                                           | 87                                            |
| B factors                                                      |                                               |                                               |                                               |
| Protein                                                        | 24                                            | 16                                            | 21                                            |
| NADP <sup>+</sup>                                              | 20                                            | 13                                            | 15                                            |
| folate                                                         | 23                                            | 16                                            | 24                                            |
| water                                                          | 46                                            | 34                                            | 34                                            |
| Deviation from                                                 |                                               |                                               |                                               |
| Bond length (Å)                                                | 0.013                                         | 0.006                                         | 0.005                                         |
| Bond angle (°)                                                 | 2.943                                         | 1.047                                         | 0.991                                         |
| Ramachandran plot                                              |                                               |                                               |                                               |
| Most favorable                                                 | 99.36                                         | 99.36                                         | 99.36                                         |
| allowed                                                        | 0.64                                          | 0.64                                          | 0.64                                          |
| disallowed                                                     | 0                                             | 0                                             | 0                                             |
| PDB ID                                                         | 7D6G                                          |                                               |                                               |
| single structure                                               | -                                             | 7D3Z                                          | 7D4L                                          |
| ensemble structure                                             | -                                             | 7D49                                          | 7D4X                                          |

<sup>a</sup> Numbers in parentheses represent values in the highest resolution shell.

<sup>b</sup>  $R_{\text{sym}} = \sum(|I_i - \langle I \rangle|) / \sum(I)$ , where  $I_i$  is the measured intensity and  $\langle I \rangle$  is the mean intensity of all measured observations equivalent to reflection  $I_i$ .

<sup>c</sup>  $R_{\text{work}} = \sum ||F_{\text{obs}}| - |F_{\text{calc}}|| / \sum |F_{\text{obs}}|$ , where  $|F_{\text{obs}}|$  is the observed diffraction amplitude,  $|F_{\text{calc}}|$  is the corresponding calculated structure factor amplitude.

<sup>d</sup>  $R_{\text{free}}$  is defined by  $R_{\text{work}}$ , but involved 5% of the measured reflections not used in refinement and set aside for cross-validation purpose.

**Table S2: SCS-MP2 /def2-SVPD Electronic Energies and Energy Differences in Proton Affinity between Dihydrofolate and Folate**

|               | E (Hartrees)-<br>neutral | E(Hartrees)-<br>protonated | $\Delta E$ (kcal/mol) | $\Delta\Delta E$ (kcal/mol) |
|---------------|--------------------------|----------------------------|-----------------------|-----------------------------|
| Dihydrofolate | -618.945825              | -619.336145                | 244.9                 | 24.0                        |
| Folate        | -617.775131              | -618.127115                | 220.9                 |                             |
